# Supplementary material for: Sputum Glucose and Glycemic Control in Cystic Fibrosis-Related Diabetes: A Cross-Sectional Study
Source: PLoS One. 2015 Mar 24;10(3):e0119938. doi: 10.1371/journal.pone.0119938 (PMC4372582; doi:10.1371/journal.pone.0119938)
Supplement: S2 Dataset — (CSV) [file pone.0119938.s002.csv]

Subject #	# sputum samples	Age	Sex	Ethnicity	Glucose Tolerance	A1c > 6.5%	Years of CFRD	Mean SG (mM)	2-year mean HbA1C	Total PEx admissions 2012 - 2013	Average length of PEx admission	Mean BMI	Mean FEV1	Mean FEF25-75	Historic FBG	Historic 2-hr post-prandial BG
02	7	17	F	1	CFRD uncontrolled	greater	5	1.4214285714	6.76	5	20.2	17.324285714	22.142857143	10.714285714
03	1	18	M	1	CFRD well controlled	less	5		5.97	2	15.5
04	1	17	M	2	IGT	less			5.53	2	15				83	176
05	3	15	M	1	NGT	less		3.62	5.4	7	14.86	20.566666667	42	20
06	7	20	M	1	IGT	less		0.9414285714	6.13	6	19.67	19.671428571	20.857142857	5.8571428571	111	181
09	4	14	F	1	NGT	less		5.7375	5.675	4	17.25	18.775	47.5	27.75	95	129
10	1	19	M	0	CFRD uncontrolled	greater	9	1.39	7.25	2	7.5	22.3	58	30
11	1	10	F	1	NGT	less		0	5.65	1	15	24.95	94	67	92	114
13	1	18	M	1	CFRD well controlled	less	3	0.97	5.4	0	0	23	85	52
14	2	13	F	1	CFRD well controlled	less	6	6.76	5.825	5	15.4	18.8	70	34
15	2	10	F	0	IGT	less		1.25	5.6	5	11.8	14.185	91.5	84.5	91	125
18	2	20	M	0	IGT	less		0.02	5.4			21.45	93	61	99	206
19	7	15	F	2	CFRD uncontrolled	greater	2	0.3542857143	6.55	7	21	17.95	34.666666667	10.333333333
21	1	21	F	0	NGT	less			5.2	2	10.5				82	79
23	2	14	F	0	NGT	less		0	5.7	1	7	16.7	67	45.5
24	4	15	F	0	IGT	less		13.0375	5.26	2	6	18.726666667	74.5	98.25	89	113
25	4	15	M	1	CFRD well controlled	less	3	0.3825	5.35	7	21	17.525	83.75	58.25	93	73
26	1	21	F	0	CFRD uncontrolled	greater	4		6.825	4	23
27	2	12	M	1	CFRD well controlled	less	2	0.75	5.625	7	10.57	17.05	66	37.5
28	1	14	F	1	IGT	less		5.21	5.76	4	9.75	22.9	81	70	101	119
29	1	12	F	1	NGT	less		3.57	6.133	3	18.67	21.1	96	70	114	120
30	1	12	M	1	NGT	less			5.45	0	0				99	129
31	3	9	F	1	CFRD well controlled	less	3	0	5.475	0	0	13.683333333	73.333333333	67.333333333	87	143
32	2	15	M	0	IGT	less		0.3	5.7	3	24.67	15.35	64	47	94	89
33	1	14	M	1	NGT	less		31.29	5.9	2	15.5	19.6	75	47	90	136
34	3	17	M	1	NGT	less		2.6533333333	5.5	7	19.71	17.733333333	63.666666667	48
35	1	9	F	1	NGT	less		1.98	5.4	1	15	18.9	103	96
36	2	12	M	0	NGT	less		25.145	5.6	1	7	18.22	83	80.5	97	76
37	1	20	F	1	NGT	less			5.6	4	11				93	108
38	1	7	M	1	NGT	less			5.9	1	17				92	132
39	1	14	M	1	IGT	less		1.64	5.85	1	17	18.1	92		90	85
40	1	18	F	0	CFRD well controlled	less	2	0.01	5.325	6	13.2	18.1	69	63
41	1	19	F	1	NGT	less		0	5.3	3	11.33	17.3	27	7	95	116
42	1	13	F	1	NGT	less			5.96	3	12.67
43	1	19	F	0	NGT	less		16.63	5.6	0	0	22.5			99	127
44	1	12	F	1	IGT	less			5.7	0	0				85
45	1	16	M	0	NGT	less		0	5.2	0	0	19.66	103	101	103	123
K01	1	20	F	0	NGT			16.83				19.29	90	68
K02	1	33	F	1	CFRD well controlled	less	3	1.24	5.56	7	10	21.29	42	15
K03	1	33	F		NGT	less			5.8	4	15.25
K04	2	34	F	0	NGT	less		5.14	6	1	5	21.075
K05	1	42	F	0	CFRD uncontrolled	greater	16	2.33	7.8	11	21.363636364	24.38
K06	1	33	F	0	CFRD uncontrolled	greater	24	0.09	7.6333333333	1	16	19.16	52	16
K07	1	40	M	0	NGT	less		16.48	5.5			16.61
K08	2	27	M	0	NGT	less		7.405	5.7333			19.39	26	9
K09	1	27	M	0	NGT	less		0	6.5	6	17.166666667	18.16	24	7
K10	1	21	M	0	IGT	less		0	5.4			21.98	94	68
K11	1	27	M	0	NGT	less		0.89	5.2	0	0	20.24	34	7
K12	3	44	M	0	CFRD well controlled	less	3	1.6033333333	6.2833333333			24.856666667	29.5	7.5
K13	1	32	F	0	NGT	less		0.72	6	0	0	23.63
K14	1	30	M	0	NGT	less		0	5.4	0	0	28.19	102	102
K15	1	31	M	0	IGT	less		0	6.4	1	16	22.6	73	53
K16	1	35	M	0	NGT	less		0	5.85	1	12	24.73	45	22
K17	1	35	F	0	NGT	less		0	5.128571429	4	10	20.5	35	9
K18	1	36	M	0	CFRD uncontrolled	greater	21	0	8.133333333	5	6	29.63
K19	1	27	F	1	CFRD well controlled	less	3	0	5.5	7	10	27.51	55	37
K20	1	48	F	0	CFRD uncontrolled	greater	24	0	7.5	2	10	28.52	35	9
K21	1	21	M	0	CFRD well controlled	less	1	0	6.4			21.92
K22	1	39	M	0	CFRD well controlled	less	24	0.59	6.35	4	14	26.15	37	9
K23	1	32	M	0	NGT	less		0	5.4	2	4	23.73	74	47
K24	2	25	M	1	NGT	less		31.655	6.5	4	15	19.44	36	13
K25	1	27	M	0	NGT	less		0	5.9			22.37	88	68
K26	1	26	M	0	CFRD well controlled	less	26	0	6	1	5
K27	1	29	M	1	CFRD well controlled	less		0	5.8	3	9	21.28
K28	1	32	F	0	NGT	less			5.75	13	19
K29	1	27	F	1	NGT	less		11.63	5.45	5	10	27.05
K30	1	27	F	0	NGT			52.99		2	15
K31	1	34	F	1	CFRD well controlled	less		14.19	5.6875	12	17	24.02
K32	1	29	M	0	NGT	less		0	5.55	0	0	23.9	108	98
K33	1	33	F	0	NGT	less			5.45	0	0
K34	1	36	F	0	NGT	less			5.7	2	9
K35	1	43	M	0	CFRD uncontrolled	greater	24		6.766666667	6	11
K36	1	43	M	1	CFRD well controlled	less		0	5.2	4	7	28.96
K37	1	32	M	0	CFRD uncontrolled	greater	24	0	7.49	3	15	20.72
K38	1	36	M	0	NGT	less		3.93	4.8	8	15	21.1	26	6
K39	1	26	M	1	NGT	less		5.66	5.5	3	10.333333333	26.77	65	29
K40	1	25	F	1	CFRD well controlled	less			5.75	11	18.272727273
K41	1	28	M	0	NGT	less		64.62	5.9			22.19	22.19
K42	1	32	F	0	CFRD well controlled	less	2	0	6.1125	3	12.333	21.19
K43	1	21	F	0	NGT	less		3.12	6	1	8	22.58
K44	1	51	M	0	NGT	less		1.58	5.4	0	0	21.19
K45	1	18	M	0	NGT			2.22				18.03
K46	1	31	M	0	IGT	less		0.86	5.15	1	3	19.23
K47	2	23	M	0	NGT	less		0.305	5.5	4	15	19.32
K48	1	22	M	0	NGT	less			6.1
K49	1	37	M	0	NGT	less		1.74	5.9			19.7
K50	1	23	M	1	NGT	less		5.99	6.19	1	10	20.37
K51	1	23	M	1	NGT			8.4	6.1			18.19
